# Supplementary material for: SNHG12 promotes carcinogenesis of human renal cell cancer via functioning as a competing endogenous RNA and sponging miR‐30a‐3p
Source: PubMed Central journal article supplement (PMC8107103; doi:10.1111/jcmm.16417), 2021-03-30

**a**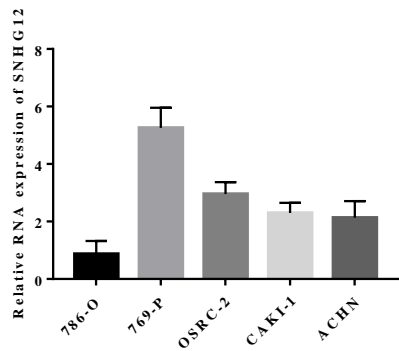**b**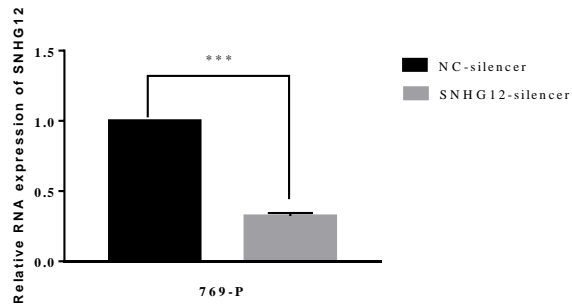**c**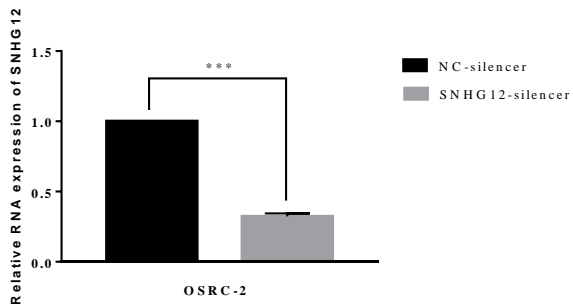**d**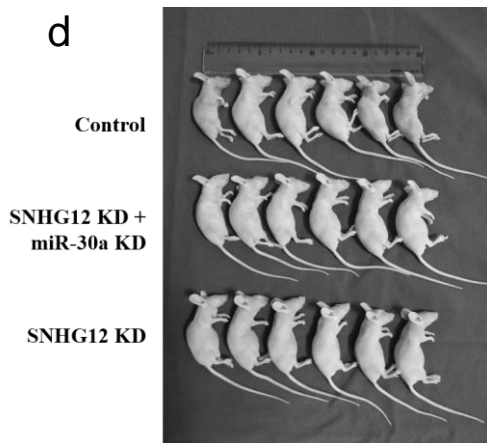

Supplement: JCMM-25-4696-s001.pdf [file JCMM-25-4696-s001.pdf]
